# Supplementary material for: A survey of integral α-helical membrane proteins
Source: PubMed Central journal article supplement — J Struct Funct Genomics. 2009 Sep 17;10(4):269–80. doi: 10.1007/s10969-009-9069-8 (PMC2780624; doi:10.1007/s10969-009-9069-8), 2009-09-17
Supplement: 10969_2009_9069_MOESM1_ESM.pdf [file 10969_2009_9069_MOESM1_ESM.pdf]

# A survey of integral membrane proteins:

## Supplementary figures and tables

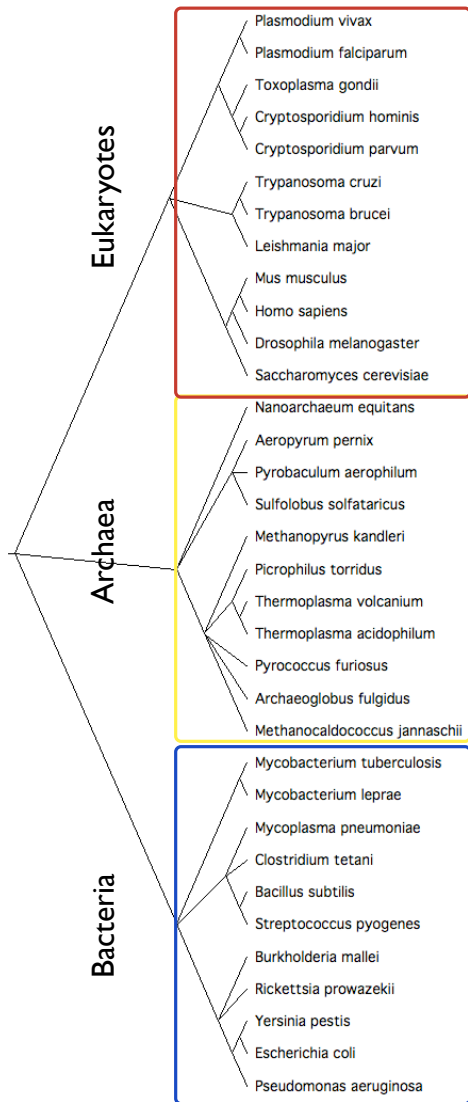

Supplementary Figure 1: 34 selected organisms.

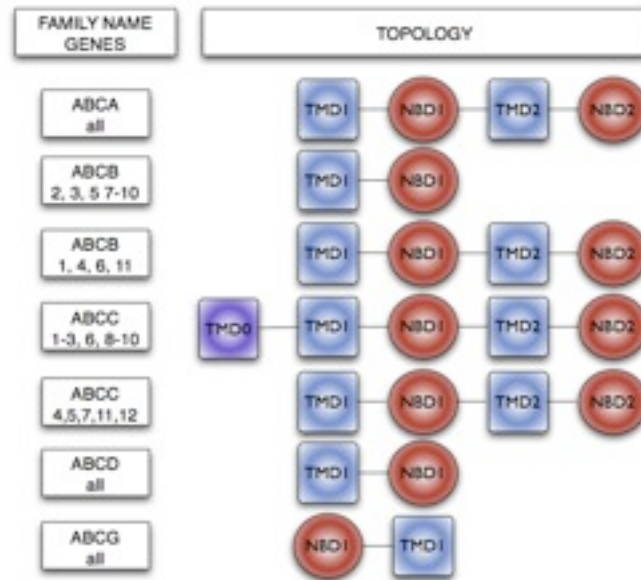

**Supplementary Figure 2: Human ABC transporter domain structure.** The human ABC transporter superfamily consists of 48 proteins with varying numbers of transmembrane domains (TMD, purple and cyan) and globular nucleotide binding domains (NBD, red). There are both full transporters, such as ABCB1 (P-glycoprotein) which have four domains, two TMDs and two NBDs, and half transporters such as ABCD1 (ALD) which have one TMD and one NBD per polypeptide chain. ABCG family members have the NBD N-terminal to the TMD, in contrast to the other families.

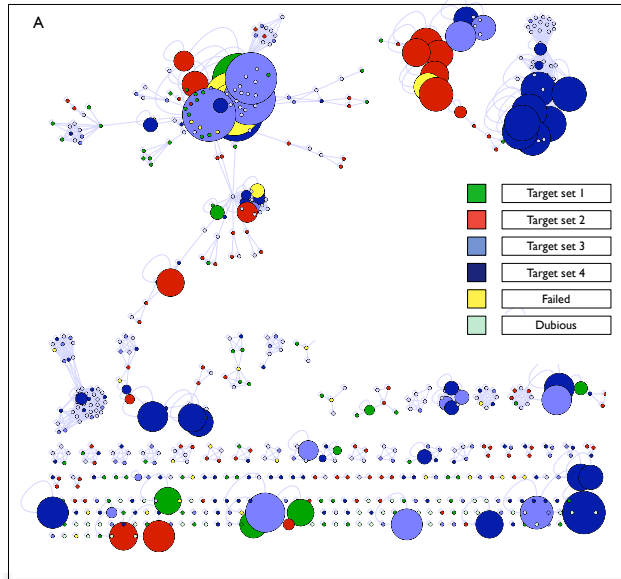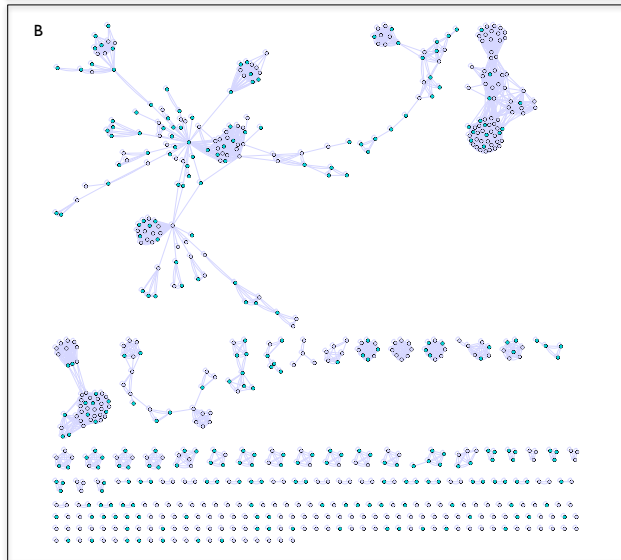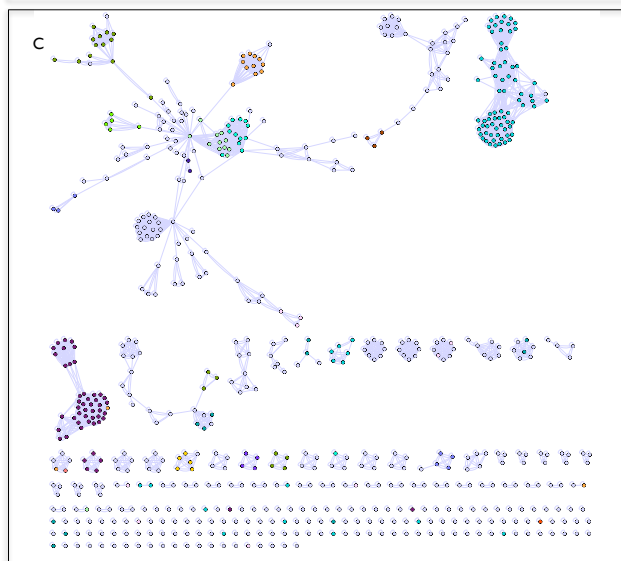

**Supplementary Figure 3: Membrane protein target selection in *S. cerevisiae*. A)**

There are 621 predicted IM proteins in yeast, four sets of 96 targets, colored green, red, light blue, and dark blue were selected from this set for a structural genomics project in yeast. Each of the IM proteins is represented as a node, and nodes are connected if their sequence profiles are significantly related and are colored by their target set. Dubious targets (yellow) were sequences that the *Saccharomyces* Genome Database annotated as “Dubious,” which SGD defines as an open reading frame that is unlikely to encode an expressed protein. Failed targets (mint green) were sequences that failed any step of the experimental pipeline, for example, sequences that could not be cloned. Node size indicates the number of sequences homologous to the target. B) Yeast IM proteins with human homologs are shown in cyan. C) Pfam-defined clans mapped to Yeast IM proteins.

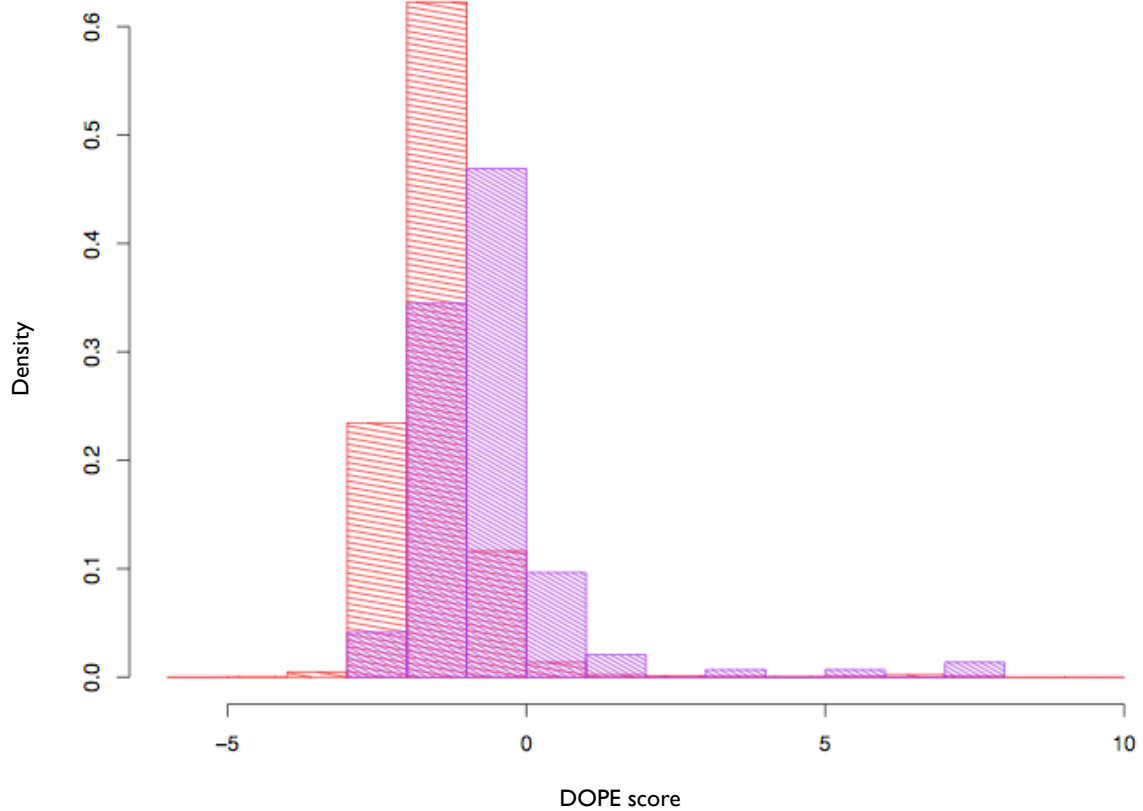

**Supplementary Figure 4: ZDOPE statistical potential scores for native protein structures solved using X-ray crystallography.** The distribution of Z-scores for integral alpha-helical membrane proteins (n=145, blue) is shifted higher than the scores for globular proteins (n=36786, red). The average Z-score for a membrane protein is -0.63, while the score for the globular proteins is -1.56. We use a Z-score cutoff of 0 when assessing models of membrane proteins.

**Supplementary Table 1: 598 Pfam families predicted by TMHMM to have three or more transmembrane helices**

| <b>Pfam_ID</b> | <b>Pfam_description</b> |
|----------------|-------------------------|
| PF00001.12     | 7tm_1                   |
| PF00002.15     | 7tm_2                   |
| PF00003.12     | 7tm_3                   |
| PF00029.9      | Connexin                |
| PF00032.8      | Cytochrom_B_C           |
| PF00033.9      | Cytochrom_B_N           |
| PF00060.17     | Lig_chan                |
| PF00083.14     | Sugar_tr                |
| PF00115.10     | COX1                    |
| PF00119.11     | ATP-synt_A              |
| PF00124.9      | Photo_RC                |
| PF00146.11     | NADHdh                  |
| PF00209.9      | SNF                     |
| PF00223.9      | PsaA_PsaB               |
| PF00230.10     | MIP                     |
| PF00324.11     | AA_permease             |
| PF00335.10     | Tetraspannin            |
| PF00344.11     | SecY                    |
| PF00361.10     | Oxidored_q1             |
| PF00375.9      | SDF                     |
| PF00420.14     | Oxidored_q2             |
| PF00421.9      | PSII                    |
| PF00474.8      | SSF                     |
| PF00487.14     | FA_desaturase           |
| PF00499.10     | Oxidored_q3             |
| PF00510.9      | COX3                    |
| PF00520.21     | Ion_trans               |
| PF00528.12     | BPD_transp_1            |
| PF00654.10     | Voltage_CLC             |
| PF00664.13     | ABC_membrane            |
| PF00689.11     | Cation_ATPase_C         |
| PF00771.10     | FHIPEP                  |
| PF00810.9      | ER_lumen_recept         |
| PF00813.10     | FliP                    |
| PF00822.11     | PMP22_Claudin           |
| PF00854.12     | PTR2                    |
| PF00873.9      | ACR_tran                |
| PF00876.9      | Innexin                 |
| PF00892.11     | DUF6                    |
| PF00893.10     | Multi_Drug_Res          |
| PF00902.8      | TatC                    |
| PF00909.11     | Ammonium_transp         |
| PF00950.8      | ABC-3                   |
| PF00951.9      | Arteri_Gl               |

|            |                 |
|------------|-----------------|
| PF00953.11 | Glycos_transf_4 |
| PF00955.11 | HCO3_cotransp   |
| PF00999.11 | Na_H_Exchanger  |
| PF01001.9  | HCV_NS4b        |
| PF01002.9  | Flavi_NS2B      |
| PF01005.9  | Flavi_NS2A      |
| PF01007.10 | IRK             |
| PF01027.11 | UPF0005         |
| PF01032.9  | FecCD           |
| PF01036.9  | Bac_rhodopsin   |
| PF01040.9  | UbiA            |
| PF01045.8  | EIAV_GP45       |
| PF01061.14 | ABC2_membrane   |
| PF01062.11 | Bestrophin      |
| PF01080.8  | Presenilin      |
| PF01098.10 | FTSW_RODA_SPOVE |
| PF01124.9  | MAPEG           |
| PF01127.12 | Sdh_cyt         |
| PF01148.10 | CTP_transf_1    |
| PF01151.9  | ELO             |
| PF01184.10 | Grp1_Fun34_YaaH |
| PF01219.9  | DAGK_prokar     |
| PF01222.8  | ERG4_ERG24      |
| PF01226.8  | Form_Nir_trans  |
| PF01235.8  | Na_Ala_symp     |
| PF01252.9  | Peptidase_A8    |
| PF01275.9  | Myelin_PLP      |
| PF01284.13 | MARVEL          |
| PF01292.10 | Ni_hydr_CYTB    |
| PF01306.10 | LacY_symp       |
| PF01311.11 | Bac_export_1    |
| PF01312.10 | Bac_export_2    |
| PF01349.8  | Flavi_NS4B      |
| PF01350.8  | Flavi_NS4A      |
| PF01384.11 | PHO4            |
| PF01461.8  | 7tm_4           |
| PF01478.8  | Peptidase_A24   |
| PF01490.8  | Aa_trans        |
| PF01496.9  | V_ATPase_I      |
| PF01528.7  | Herpes_glycop   |
| PF01534.7  | Frizzled        |
| PF01538.8  | HCV_NS2         |
| PF01545.11 | Cation_efflux   |
| PF01554.9  | MatE            |
| PF01566.9  | Nramp           |
| PF01569.12 | PAP2            |
| PF01578.11 | Cytochrom_C_asm |
| PF01589.7  | Alpha_E1_glycop |
| PF01594.7  | UPF0118         |
| PF01595.10 | DUF21           |

|            |                 |
|------------|-----------------|
| PF01598.8  | Sterol_desat    |
| PF01602.10 | Adaptin_N       |
| PF01621.8  | Fusion_gly_K    |
| PF01635.9  | Corona_M        |
| PF01654.8  | Bac_Ubq_Cox     |
| PF01694.12 | Rhomboid        |
| PF01699.14 | Na_Ca_ex        |
| PF01733.8  | Nucleoside_tran |
| PF01748.15 | Serpentine_recp |
| PF01757.12 | Acyl_transf_3   |
| PF01769.7  | MgtE            |
| PF01770.9  | Folate_carrier  |
| PF01790.9  | LGT             |
| PF01794.9  | Ferric_reduct   |
| PF01810.9  | LysE            |
| PF01889.8  | DUF63           |
| PF01891.7  | CbiM            |
| PF01901.7  | DUF70           |
| PF01914.8  | MarC            |
| PF01925.9  | DUF81           |
| PF01940.7  | DUF92           |
| PF01943.8  | Polysacc_synt   |
| PF01944.7  | DUF95           |
| PF01956.7  | DUF106          |
| PF01970.7  | DUF112          |
| PF01988.9  | DUF125          |
| PF02028.8  | BCCT            |
| PF02040.6  | ArsB            |
| PF02076.6  | STE3            |
| PF02077.6  | SURF4           |
| PF02096.11 | 60KD_IMP        |
| PF02101.6  | Ocular_alb      |
| PF02109.6  | DAD             |
| PF02117.7  | Sra             |
| PF02118.11 | Srg             |
| PF02163.12 | Peptidase_M50   |
| PF02175.7  | Srb             |
| PF02233.7  | PNTB            |
| PF02293.6  | AmiS_UreI       |
| PF02300.8  | Fumarate_red_C  |
| PF02308.7  | MgtC            |
| PF02313.8  | Fumarate_red_D  |
| PF02322.6  | Cyto_ox_2       |
| PF02340.6  | PRRSV_Env       |
| PF02355.7  | SecD_SecF       |
| PF02361.7  | CbiQ            |
| PF02364.6  | Glucan_synthase |
| PF02366.9  | PMT             |
| PF02378.9  | PTS_EIIC        |
| PF02405.7  | DUF140          |



|            |                 |
|------------|-----------------|
| PF02411.6  | MerT            |
| PF02417.6  | Chromate_transp |
| PF02447.7  | GntP_permease   |
| PF02453.8  | Reticulon       |
| PF02460.9  | Patched         |
| PF02461.6  | AMO             |
| PF02487.8  | CLN3            |
| PF02508.5  | Rnf-Nqr         |
| PF02516.5  | STT3            |
| PF02537.6  | CRCB            |
| PF02544.7  | Steroid_dh      |
| PF02554.5  | CstA            |
| PF02592.5  | DUF165          |
| PF02600.7  | DsbB            |
| PF02605.5  | PsaL            |
| PF02628.6  | COX15-CtaA      |
| PF02632.5  | BioY            |
| PF02652.5  | Lactate_perm    |
| PF02653.6  | BPD_transp_2    |
| PF02654.6  | CobS            |
| PF02656.6  | DUF202          |
| PF02660.6  | DUF205          |
| PF02665.5  | Nitrate_red_gam |
| PF02667.5  | SCFA_trans      |
| PF02673.9  | BacA            |
| PF02674.6  | Colicin_V       |
| PF02681.5  | DUF212          |
| PF02683.6  | DsbD            |
| PF02687.11 | FtsX            |
| PF02688.11 | DUF215          |
| PF02690.6  | Na_Pi_cotrans   |
| PF02694.6  | UPF0060         |
| PF02705.7  | K_trans         |
| PF02714.6  | DUF221          |
| PF02932.6  | Neur_chan_memb  |
| PF02949.11 | 7tm_6           |
| PF02967.5  | Fum_red_TM      |
| PF02990.7  | EMP70           |
| PF03006.10 | HlyIII          |
| PF03010.5  | GP4             |
| PF03023.5  | MVIN            |
| PF03025.5  | Papilloma_E5    |
| PF03030.7  | H_PPase         |
| PF03034.6  | PSS             |
| PF03040.5  | CemA            |
| PF03053.5  | Corona_NS3b     |
| PF03062.9  | MBOAT           |
| PF03073.6  | TspO_MBR        |
| PF03076.5  | GP3             |
| PF03092.7  | BT1             |

|            |                 |
|------------|-----------------|
| PF03094.6  | Mlo             |
| PF03116.5  | NQR2_RnfD_RnfE  |
| PF03124.5  | EXS             |
| PF03125.8  | Sre             |
| PF03137.10 | OATP            |
| PF03151.7  | TPT             |
| PF03155.6  | Alg6_Alg8       |
| PF03169.6  | OPT             |
| PF03186.4  | CobD_Cbib       |
| PF03188.6  | Cytochrom_B561  |
| PF03189.4  | DUF270          |
| PF03203.5  | MerC            |
| PF03208.9  | PRA1            |
| PF03209.6  | PUCC            |
| PF03219.5  | TLC             |
| PF03222.4  | Trp_Tyr_perm    |
| PF03239.4  | FTR1            |
| PF03248.4  | Rer1            |
| PF03253.5  | UT              |
| PF03268.5  | DUF267          |
| PF03303.4  | WTF             |
| PF03311.4  | Cornichon       |
| PF03323.4  | GerA            |
| PF03334.5  | PhaG_MnhG_YufB  |
| PF03348.6  | Serinc          |
| PF03379.4  | CcmB            |
| PF03383.6  | Serpentine_r_xa |
| PF03390.6  | Na_citrate      |
| PF03402.4  | V1R             |
| PF03419.4  | Peptidase_U4    |
| PF03530.4  | SK_channel      |
| PF03547.8  | Mem_trans       |
| PF03552.5  | Cellulose_synt  |
| PF03553.4  | Na_H_antiporter |
| PF03591.5  | AzIC            |
| PF03594.4  | BenE            |
| PF03595.8  | C4dic_mal_tran  |
| PF03596.4  | Cad             |
| PF03600.6  | CitMHS          |
| PF03601.5  | Cons_hypoth698  |
| PF03605.4  | DcuA_DcuB       |
| PF03606.6  | DcuC            |
| PF03608.4  | EII-GUT         |
| PF03609.5  | EII-Sor         |
| PF03611.5  | EIIC-GAT        |
| PF03613.5  | EIID-AGA        |
| PF03616.4  | Glt_symporter   |
| PF03619.7  | DUF300          |
| PF03626.4  | COX4_pro        |
| PF03631.5  | Ribonuclease_BN |

|           |                 |
|-----------|-----------------|
| PF03647.4 | TMEM14          |
| PF03649.4 | UPF0014         |
| PF03653.4 | UPF0093         |
| PF03661.4 | UPF0121         |
| PF03694.4 | Erg28           |
| PF03699.4 | UPF0182         |
| PF03706.4 | UPF0104         |
| PF03739.4 | YjgP_YjgQ       |
| PF03741.6 | TerC            |
| PF03772.6 | Competence      |
| PF03773.4 | DUF318          |
| PF03788.5 | LrgA            |
| PF03798.6 | LAG1            |
| PF03806.4 | ABG_transport   |
| PF03812.4 | KdgT            |
| PF03814.6 | KdpA            |
| PF03817.4 | MadL            |
| PF03820.8 | Mtc             |
| PF03821.6 | Mtp             |
| PF03824.6 | NicO            |
| PF03825.7 | Nuc_H_symport   |
| PF03842.4 | Silic_transp    |
| PF03845.4 | Spore_permease  |
| PF03857.4 | Colicin_im      |
| PF03862.4 | SpoVA           |
| PF03866.4 | HAP             |
| PF03878.6 | YIF1            |
| PF03899.6 | ATP_synt_I      |
| PF03901.7 | Glyco_transf_22 |
| PF03916.5 | NrfD            |
| PF03956.4 | DUF340          |
| PF03977.4 | OAD_beta        |
| PF03982.3 | DAGAT           |
| PF04018.4 | DUF368          |
| PF04020.4 | DUF360          |
| PF04039.4 | MnhB            |
| PF04061.5 | ORMDL           |
| PF04080.3 | Per1            |
| PF04087.4 | DUF389          |
| PF04093.3 | MreD            |
| PF04103.5 | CD20            |
| PF04109.6 | APG9            |
| PF04114.4 | Gaa1            |
| PF04120.3 | Iron_permease   |
| PF04123.3 | DUF373          |
| PF04133.4 | Vps55           |
| PF04138.4 | GtrA            |
| PF04142.6 | Nuc_sug_transp  |
| PF04144.4 | SCAMP           |
| PF04145.6 | Ctr             |

|           |                 |
|-----------|-----------------|
| PF04148.4 | DUF396          |
| PF04160.3 | Borrelia_orfX   |
| PF04161.4 | Arv1            |
| PF04163.3 | Tht1            |
| PF04165.3 | DUF401          |
| PF04171.3 | DUF405          |
| PF04172.6 | LrgB            |
| PF04173.4 | DoxD            |
| PF04178.3 | Got1            |
| PF04188.3 | Mannosyl_trans2 |
| PF04191.3 | PEMT            |
| PF04206.3 | MtrE            |
| PF04207.3 | MtrD            |
| PF04211.3 | MtrC            |
| PF04215.3 | SgaT_UlaA       |
| PF04224.3 | DUF417          |
| PF04235.3 | DUF418          |
| PF04238.3 | DUF420          |
| PF04240.3 | DUF422          |
| PF04247.3 | SirB            |
| PF04258.4 | Peptidase_A22B  |
| PF04276.3 | DUF443          |
| PF04279.6 | IspA            |
| PF04284.3 | DUF441          |
| PF04290.3 | DctQ            |
| PF04298.3 | Zn_peptidase_2  |
| PF04306.3 | DUF456          |
| PF04323.3 | DUF474          |
| PF04332.5 | DUF475          |
| PF04333.3 | VacJ            |
| PF04342.3 | DUF486          |
| PF04346.3 | EutH            |
| PF04387.5 | PTPLA           |
| PF04401.4 | DUF540          |
| PF04403.3 | PqiA            |
| PF04474.3 | DUF554          |
| PF04479.3 | RTA1            |
| PF04506.4 | Rft-1           |
| PF04511.5 | DER1            |
| PF04515.3 | DUF580          |
| PF04535.3 | DUF588          |
| PF04544.3 | Herpes_UL20     |
| PF04547.3 | DUF590          |
| PF04549.5 | CD47            |
| PF04550.3 | Phage_holin_2   |
| PF04600.3 | DUF571          |
| PF04602.3 | Arabinose_trans |
| PF04608.3 | PgpA            |
| PF04610.4 | TrbL            |
| PF04632.3 | FUSC            |

|           |                 |
|-----------|-----------------|
| PF04633.3 | Herpes_BMRF2    |
| PF04647.5 | AgrB            |
| PF04654.3 | DUF599          |
| PF04657.4 | DUF606          |
| PF04750.5 | Far-17a_AIG1    |
| PF04756.4 | OST3_OST6       |
| PF04789.6 | DUF621          |
| PF04791.6 | LMBR1           |
| PF04819.3 | DUF716          |
| PF04884.5 | DUF647          |
| PF04893.7 | Yip1            |
| PF04896.3 | AmoC            |
| PF04906.4 | Tweety          |
| PF04923.3 | Ninjurin        |
| PF04955.3 | HupE_UreJ       |
| PF04973.3 | NMN_transporter |
| PF04976.3 | DmsC            |
| PF04982.4 | HPP             |
| PF04987.4 | PigN            |
| PF05007.3 | Mannosyl_trans  |
| PF05024.5 | Gpi1            |
| PF05038.3 | Cytochrom_B558a |
| PF05072.4 | Herpes_UL43     |
| PF05078.3 | DUF679          |
| PF05090.4 | VKG_Carbox      |
| PF05095.3 | DUF687          |
| PF05106.3 | Phage_holin_3   |
| PF05128.3 | DUF697          |
| PF05140.4 | ResB            |
| PF05145.3 | AmoA            |
| PF05197.4 | DUF714          |
| PF05208.4 | ALG3            |
| PF05216.4 | UNC-50          |
| PF05230.2 | MASE2           |
| PF05241.2 | EBP             |
| PF05255.2 | UPF0220         |
| PF05313.3 | Pox_P21         |
| PF05346.2 | DUF747          |
| PF05425.3 | CopD            |
| PF05461.2 | ApoL            |
| PF05462.2 | Dicty_CAR       |
| PF05468.2 | Bac_ATP_syn_I   |
| PF05478.2 | Prominin        |
| PF05512.2 | AWPM-19         |
| PF05513.2 | TraA            |
| PF05514.2 | HR_lesion       |
| PF05525.3 | Branch_AA_trans |
| PF05529.2 | Bap31           |
| PF05562.2 | WCOR413         |
| PF05571.3 | DUF766          |

|           |                |
|-----------|----------------|
| PF05579.4 | Peptidase_S32  |
| PF05602.3 | CLPTM1         |
| PF05620.2 | DUF788         |
| PF05628.3 | Borrelia_P13   |
| PF05631.4 | DUF791         |
| PF05640.4 | DUF798         |
| PF05653.4 | DUF803         |
| PF05656.4 | DUF805         |
| PF05661.3 | DUF808         |
| PF05675.3 | DUF817         |
| PF05684.3 | DUF819         |
| PF05745.2 | CRPA           |
| PF05758.2 | Ycf1           |
| PF05776.3 | Papilloma_E5A  |
| PF05805.2 | L6_membrane    |
| PF05817.4 | Ribophorin_II  |
| PF05832.3 | DUF846         |
| PF05857.2 | TraX           |
| PF05858.2 | BIV_Env        |
| PF05875.3 | aPHC           |
| PF05884.3 | DUF856         |
| PF05934.2 | MCLC           |
| PF05940.2 | NnrS           |
| PF05967.2 | DUF887         |
| PF05975.3 | EcsB           |
| PF05976.2 | DUF893         |
| PF05977.4 | DUF894         |
| PF05982.3 | DUF897         |
| PF05987.3 | DUF898         |
| PF05992.3 | SbmA_BacA      |
| PF06011.3 | TRP            |
| PF06027.3 | DUF914         |
| PF06077.2 | LR8            |
| PF06081.2 | DUF939         |
| PF06105.3 | Aph-1          |
| PF06123.3 | CreD           |
| PF06126.2 | Herpes_LAMP2   |
| PF06127.2 | DUF962         |
| PF06139.2 | BphX           |
| PF06146.3 | PsiE           |
| PF06149.2 | DUF969         |
| PF06151.4 | Trehalose_recp |
| PF06157.2 | DUF973         |
| PF06161.2 | DUF975         |
| PF06166.2 | DUF979         |
| PF06168.2 | DUF981         |
| PF06173.3 | DUF986         |
| PF06177.2 | DUF988         |
| PF06181.2 | DUF989         |
| PF06182.2 | DUF990         |

|           |                 |
|-----------|-----------------|
| PF06195.3 | DUF996          |
| PF06197.3 | DUF998          |
| PF06237.3 | DUF1011         |
| PF06244.2 | DUF1014         |
| PF06271.2 | RDD             |
| PF06379.3 | RhaT            |
| PF06396.2 | AGTRAP          |
| PF06403.2 | Lamprin         |
| PF06423.2 | GWT1            |
| PF06432.2 | GPI2            |
| PF06450.2 | NhaB            |
| PF06454.2 | DUF1084         |
| PF06455.2 | NADH5_C         |
| PF06472.5 | ABC_membrane_2  |
| PF06496.2 | DUF1097         |
| PF06532.2 | DUF1109         |
| PF06539.2 | DUF1112         |
| PF06541.2 | DUF1113         |
| PF06550.2 | DUF1119         |
| PF06561.2 | DUF1123         |
| PF06570.2 | DUF1129         |
| PF06609.4 | TRI12           |
| PF06610.3 | DUF1144         |
| PF06638.2 | Strabismus      |
| PF06653.2 | DUF1164         |
| PF06656.2 | Tenui_PVC2      |
| PF06664.2 | DUF1171         |
| PF06681.4 | DUF1182         |
| PF06687.2 | SUR7            |
| PF06691.2 | DUF1189         |
| PF06699.2 | PIG-F           |
| PF06728.3 | PIG-U           |
| PF06736.2 | DUF1211         |
| PF06738.2 | DUF1212         |
| PF06749.3 | DUF1218         |
| PF06762.4 | DUF1222         |
| PF06770.2 | Arif-1          |
| PF06772.2 | LtrA            |
| PF06775.4 | DUF1226         |
| PF06790.2 | UPF0259         |
| PF06797.2 | DUF1229         |
| PF06800.3 | Sugar_transport |
| PF06813.4 | Nodulin-like    |
| PF06814.3 | Lung_7-TM_R     |
| PF06826.3 | Asp-AI_Ex       |
| PF06836.2 | DUF1240         |
| PF06899.2 | WzyE            |
| PF06912.2 | DUF1275         |
| PF06921.2 | VIRB2           |
| PF06930.2 | DUF1282         |

|           |                 |
|-----------|-----------------|
| PF06933.2 | SSP160          |
| PF06939.2 | DUF1286         |
| PF06942.2 | GlpM            |
| PF06946.2 | Phage_holin_5   |
| PF06947.3 | DUF1290         |
| PF06965.2 | Na_H_antiport_1 |
| PF06993.2 | DUF1304         |
| PF07019.2 | Rab5ip          |
| PF07062.3 | Clc-like        |
| PF07074.3 | TRAP-gamma      |
| PF07077.2 | DUF1345         |
| PF07086.2 | DUF1352         |
| PF07095.2 | IgaA            |
| PF07098.2 | DUF1360         |
| PF07099.2 | DUF1361         |
| PF07114.2 | DUF1370         |
| PF07123.2 | PsbW_2          |
| PF07136.2 | DUF1385         |
| PF07155.2 | DUF1393         |
| PF07158.2 | MatC_N          |
| PF07168.2 | FAE_3-kCoA_syn1 |
| PF07185.2 | DUF1404         |
| PF07186.2 | TraB_2          |
| PF07187.2 | DUF1405         |
| PF07220.2 | DUF1420         |
| PF07226.2 | DUF1422         |
| PF07242.2 | DUF1430         |
| PF07256.2 | DUF1435         |
| PF07260.2 | ANKH            |
| PF07264.2 | EI24            |
| PF07274.2 | DUF1440         |
| PF07281.2 | INSIG           |
| PF07284.2 | BCHF            |
| PF07291.2 | MauE            |
| PF07298.2 | NnrU            |
| PF07301.2 | DUF1453         |
| PF07314.2 | DUF1461         |
| PF07331.2 | DUF1468         |
| PF07343.2 | DUF1475         |
| PF07344.2 | Amastin         |
| PF07399.2 | DUF1504         |
| PF07402.2 | Herpes_U26      |
| PF07415.2 | Herpes_LMP2     |
| PF07444.2 | Ycf66_N         |
| PF07456.2 | Hpre_diP_synt_I |
| PF07457.2 | DUF1516         |
| PF07556.2 | DUF1538         |
| PF07613.2 | DUF1576         |
| PF07662.3 | Nucleos_tra2_C  |
| PF07666.2 | MpPF26          |



|            |                 |
|------------|-----------------|
| PF07667.2  | DUF1600         |
| PF07672.4  | MFS_Mycoplasma  |
| PF07681.2  | DoxX            |
| PF07690.6  | MFS_1           |
| PF07694.3  | 5TM-5TMR_LYT    |
| PF07695.2  | 7TMR-DISM_7TM   |
| PF07698.2  | 7TM-7TMR_HD     |
| PF07758.2  | DUF1614         |
| PF07760.2  | DUF1616         |
| PF07770.3  | SFT2            |
| PF07779.2  | Cas1p           |
| PF07786.3  | DUF1624         |
| PF07843.2  | DUF1634         |
| PF07851.3  | TMPIT           |
| PF07854.2  | DUF1646         |
| PF07856.3  | DUF1650         |
| PF07857.3  | DUF1632         |
| PF07884.4  | VKOR            |
| PF07895.2  | DUF1673         |
| PF07907.2  | YibE_F          |
| PF07916.2  | TraG_N          |
| PF07937.2  | DUF1686         |
| PF07947.4  | YhhN            |
| PF07948.2  | Nairovirus_M    |
| PF08006.2  | DUF1700         |
| PF08016.2  | PKD_channel     |
| PF08019.2  | DUF1705         |
| PF08229.2  | SHR3_chaperone  |
| PF08395.2  | 7tm_7           |
| PF08426.1  | ICE2            |
| PF08449.2  | UAA             |
| PF08507.1  | COPI_assoc      |
| PF08551.1  | DUF1751         |
| PF08552.1  | DUF1753         |
| PF08560.1  | DUF1757         |
| PF08570.1  | DUF1761         |
| PF08690.1  | GET2            |
| PF08733.1  | PalH            |
| PF08739.1  | PalI            |
| PF09323.1  | DUF1980         |
| PF09335.1  | SNARE_assoc     |
| PF00695.9  | vMSA            |
| PF00860.11 | Xan_ur_permease |
| PF00916.10 | Sulfate_transp  |
| PF00939.9  | Na_sulph_symp   |
| PF02133.6  | Transp_cyt_pur  |
| PF02386.7  | TrkH            |
| PF04922.3  | DIE2_ALG10      |
| PF05231.5  | MASE1           |
| PF05296.3  | TAS2R           |

|           |             |
|-----------|-------------|
| PF05297.2 | Herpes_LMP1 |
| PF05978.7 | DUF895      |
| PF06808.2 | DctM        |
| PF07290.2 | DUF1449     |

### Supplementary Table 2

Comparative modeling leverage of seven membrane proteins solved by the Center for the Structures of Membrane Proteins.

| PDB Code | Annotation                                                                                                                | Number of UniProt sequences modeled | Percentage of residues modeled with higher sequence identity using this template |
|----------|---------------------------------------------------------------------------------------------------------------------------|-------------------------------------|----------------------------------------------------------------------------------|
| 2ns1     | Chain A, crystal structure of the <i>E. coli</i> ammonia channel AmtB complexed with the signal transduction protein GlnK | 2086                                | 16                                                                               |
| 3bhs     | Ammonium transporter family (Rh-like protein)                                                                             | 2009                                | 17                                                                               |
| 2v8n     | Chain A, wild-type structure of lactose permease                                                                          | 5957                                | 24                                                                               |
| 2f2b     | Chain A, crystal structure of integral membrane protein aquaporin Aqpm                                                    | 2156                                | 8                                                                                |
| 2cfq     | Chain A, sugar free lactose permease at Neutral pH                                                                        | 5814                                | 23                                                                               |
| 2o9d     | Chain B, crystal structure of Aqpz mutant T183C                                                                           | 2037                                | 8                                                                                |
| 3c02     | Chain A, Aquaglyceroporin from <i>Plasmodium falciparum</i>                                                               | 1991                                | 8                                                                                |

### Supplementary Table 3

Pfam families implicated in multidrug resistance phenotypes

| <b>Pfam_ID</b> | <b>Name</b>    | <b>Description</b>                         |
|----------------|----------------|--------------------------------------------|
| PF00664        | ABC_membrane   | ABC transporter transmembrane region       |
| PF00873        | ACR_tran       | AcrB/AcrD/AcrF family                      |
| PF00893        | Multi_Drug_Res | Small Multidrug Resistance protein         |
| PF01061        | ABC2_membrane  | ABC-2 type transporter                     |
| PF01554        | MatE           | MatE                                       |
| PF03821        | Mtp            | Golgi 4-transmembrane spanning transporter |
| PF06472        | ABC_membrane_2 | ABC transporter transmembrane region 2     |
